# Supplementary material for: Open system synthesis of narrow-bandwidth red-fluorescent carbon quantum dots with a function of multi-metal ion sensing
Source: Royal Society of Chemistry journal article supplement (doi:10.1039/d3tc00419h), 2023-01-01
Supplement: d3tc00419h1.pdf [file d3tc00419h1.pdf]

## Electronic Supplementary Information

*Journal of Materials Chemistry C*

### **Open system synthesis of narrow-bandwidth red-fluorescent carbon quantum dots with a function of multi-metal ion sensing**

Rika Katakami, Kohei Sato, Akihiro Ogura, Ken-ichi Takao, Yoshiki Iso,<sup>\*</sup> and Tetsuhiko Isobe<sup>\*</sup>

*Department of Applied Chemistry, Faculty of Science and Technology, Keio University,  
3-14-1 Hiyoshi, Kohoku-ku, Yokohama 223-8522, Japan*

<sup>\*</sup>Corresponding authors.

Yoshiki Iso – E-mail: iso@applc.keio.ac.jp; Tel.: +81 45 566 1558; Fax: +81 45 566 1551; orcid.org/0000-0001-7483-2828

Tetsuhiko Isobe – E-mail: isobe@applc.keio.ac.jp; Tel.: +81 45 566 1554; Fax: +81 45 566 1551; orcid.org/0000-0002-0868-5425

## PG-CQDs

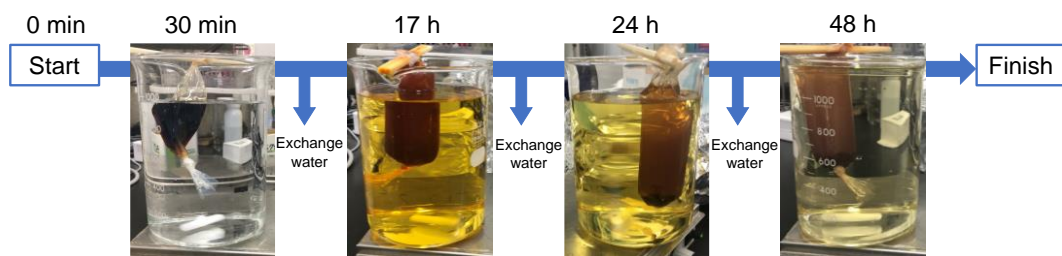

## DAR-CQDs

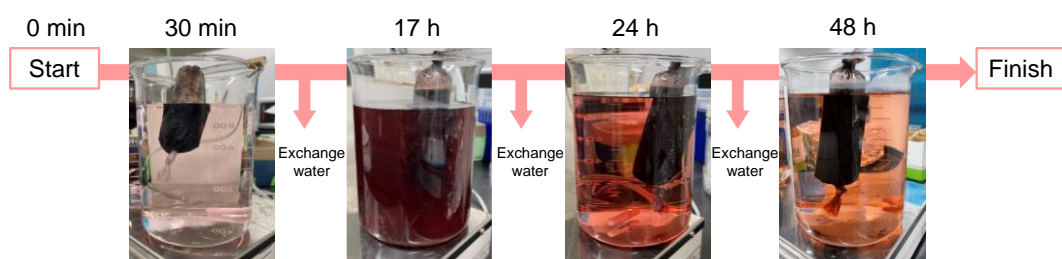

**Fig. S1.** Purification of PG-CQDs and DAR-CQDs by dialysis.

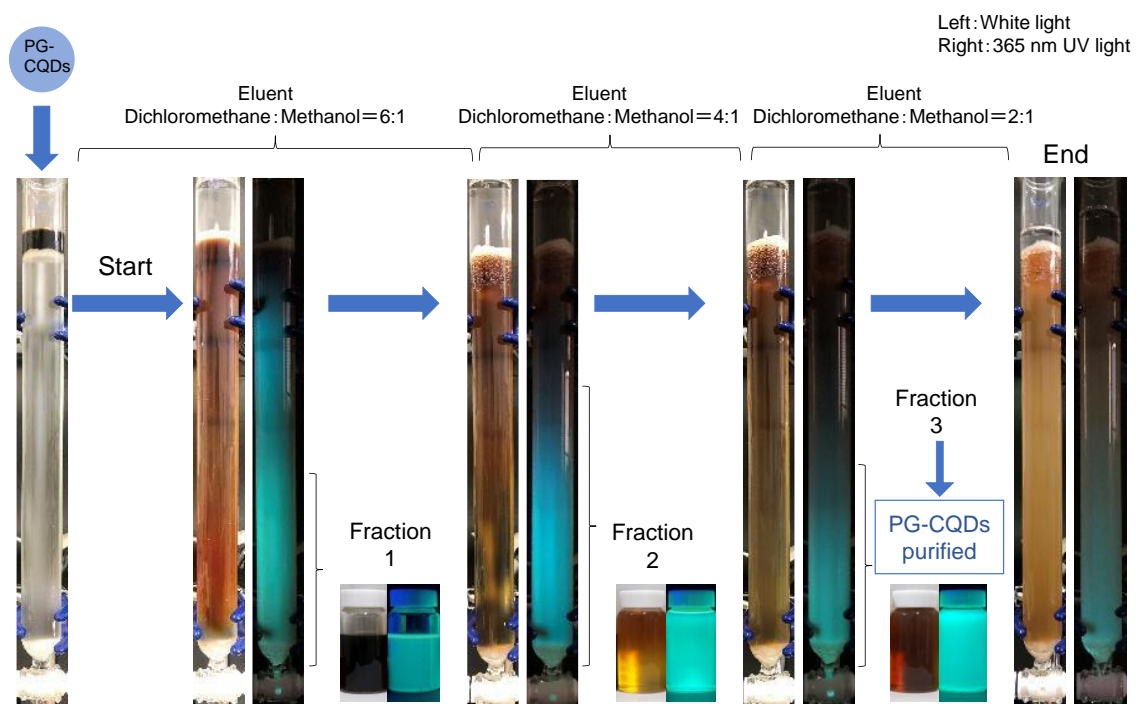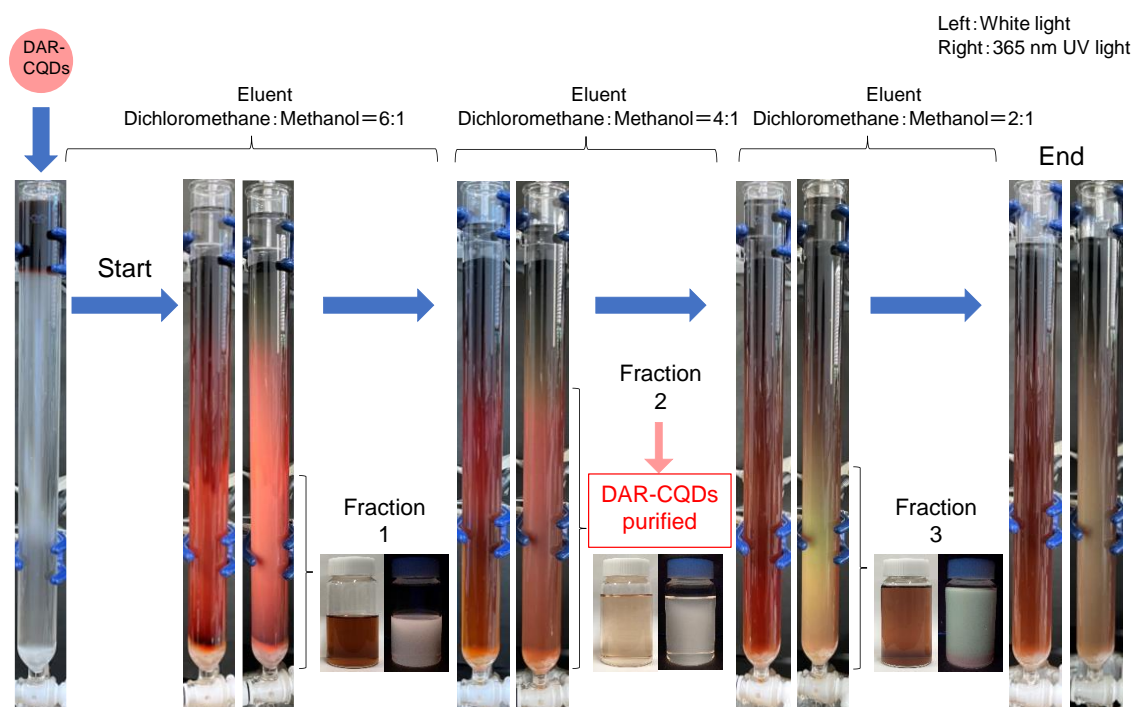

**Fig. S2.** Purification of PG-CQDs and DAR-CQDs by silica gel column chromatography.

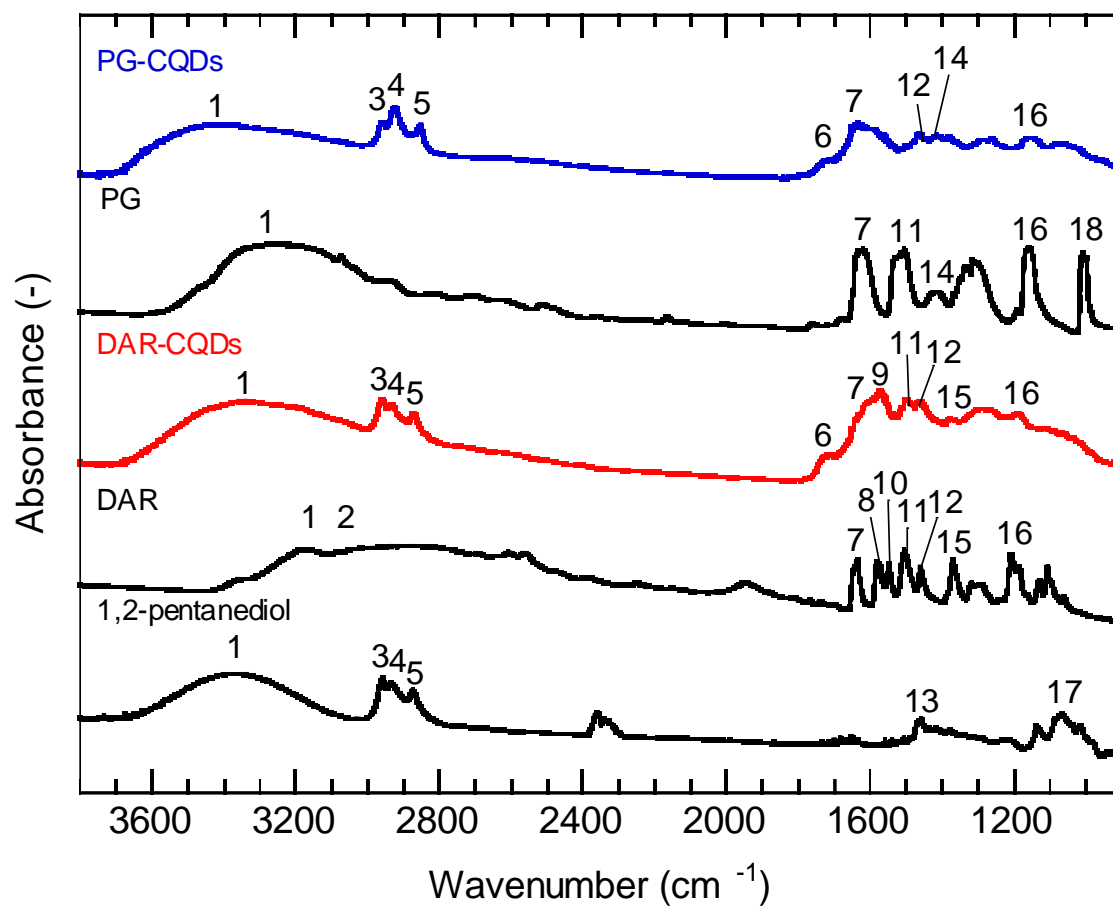

**Fig. S3.** FT-IR spectra of PG-CQDs, PG, DAR-CQDs, DAR, and 1,2-pentanediol.

**Table S1.** Assignments of FT-IR absorption peaks of Fig. S3.

| Peak | Wavelength (cm <sup>-1</sup> ) |      |           |           | Assignment          |                                                 |
|------|--------------------------------|------|-----------|-----------|---------------------|-------------------------------------------------|
|      | PG-CQDs                        | PG   | DAR-CQDs  | DAR       |                     | 1,2-pentanediol                                 |
| 1    |                                |      | 3100–3600 |           | v(O–H)              |                                                 |
| 2    |                                |      |           | 3100–3600 | v(NH <sub>2</sub> ) |                                                 |
| 3    | 2958                           |      | 2959      |           | 2959                | v <sub>as</sub> (CH <sub>3</sub> )              |
| 4    | 2925                           |      | 2933      |           | 2934                | v <sub>s</sub> (CH <sub>3</sub> )               |
| 5    | 2872                           |      | 2873      |           | 2974                | v <sub>s</sub> (CH <sub>2</sub> )               |
| 6    | 1713                           |      | 1713      |           |                     | v(C=O)                                          |
| 7    | 1651                           | 1622 | 1652      | 1636      |                     | ring(C=C)                                       |
| 8    |                                |      |           | 1580      |                     | δ <sub>as</sub> (NH <sub>3</sub> <sup>+</sup> ) |
| 9    |                                |      | 1570      |           |                     | δ(NH <sub>2</sub> )                             |
| 10   |                                |      |           | 1548      |                     | δ <sub>s</sub> (NH <sub>3</sub> <sup>+</sup> )  |
| 11   |                                | 1506 | 1505      | 1506      |                     | ring<br>semicircle<br>stretching                |
| 12   | 1467                           |      | 1468      | 1460      |                     | ring<br>semicircle<br>stretching                |
| 13   |                                |      |           |           | 1457                | δ(CH <sub>2</sub> )                             |
| 14   | 1415                           | 1418 |           |           |                     | δ(O–H)                                          |
| 15   |                                |      | 1378      | 1370      |                     | v(C–N)                                          |
| 16   | 1160                           | 1158 | 1190      | 1207      |                     | v(C–O)                                          |
| 17   |                                |      |           |           | 1067                | v <sub>as</sub> (C–C–O)                         |
| 18   |                                | 1008 |           |           |                     | δ(C–H)                                          |

v=stretching, δ=deformation or bending, as=asymmetric, s=symmetric

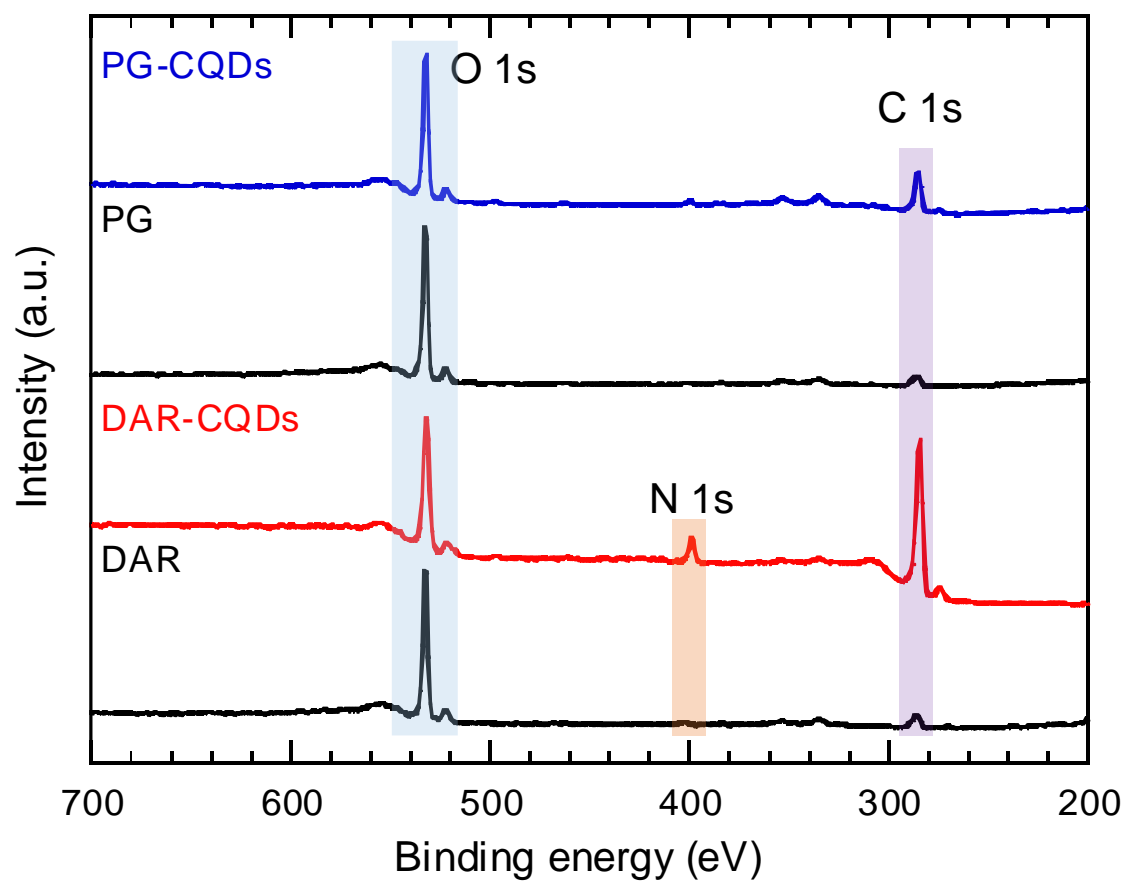

**Fig. S4.** XPS survey spectra of PG-CQDs, PG, DAR-CQDs, and DAR.

**Table S2.** Proportions of different bonds calculated from peak fitting of the C (1s) XPS spectra of PG, PG-CQDs, DAR, and DAR-CQDs.

| Sample              | C–OH [%] | C=C/C–C/C–N [%] |
|---------------------|----------|-----------------|
| PG (Calculated)     | 50       | 50              |
| PG (Measured)       | 45.9     | 54.1            |
| PG-CQDs (Measured)  | 19.3     | 80.7            |
| DAR (Calculated)    | 33.3     | 66.6            |
| DAR (Measured)      | 27.3     | 72.7            |
| DAR-CQDs (Measured) | 1.5      | 89.5            |

Calculated: obtained from molecular structure.

Measured: obtained from peak fitting of C (1s) XPS spectrum.

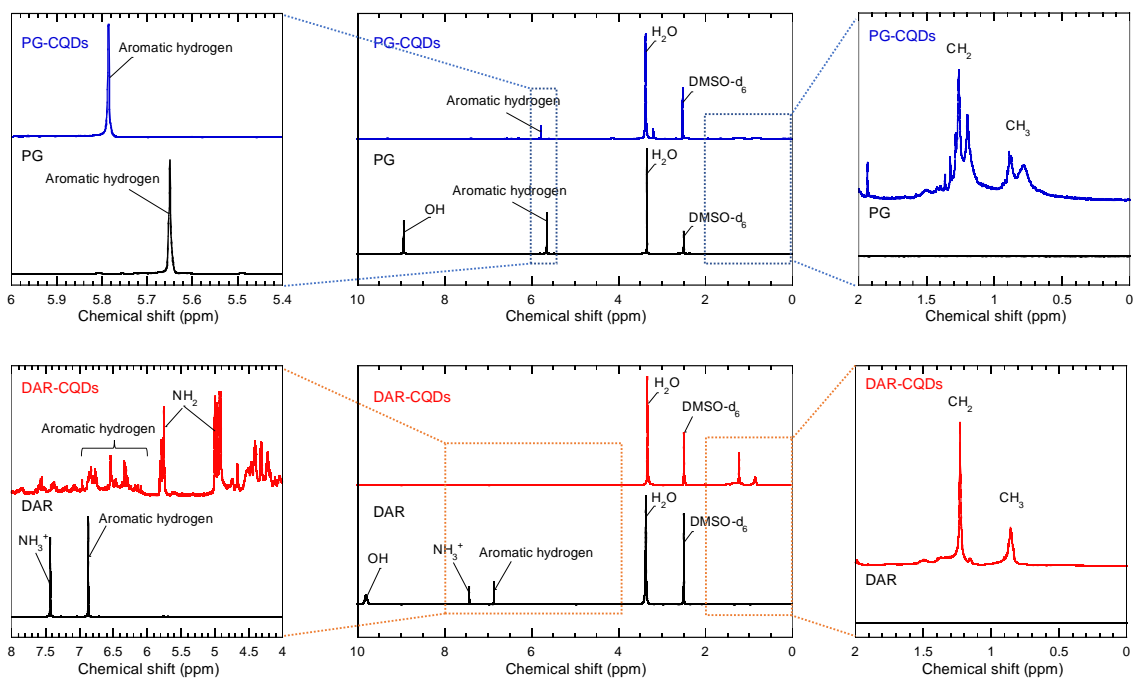

**Fig. S5.**  $^1\text{H-NMR}$  spectra of PG-CQDs and DAR-CQDs.



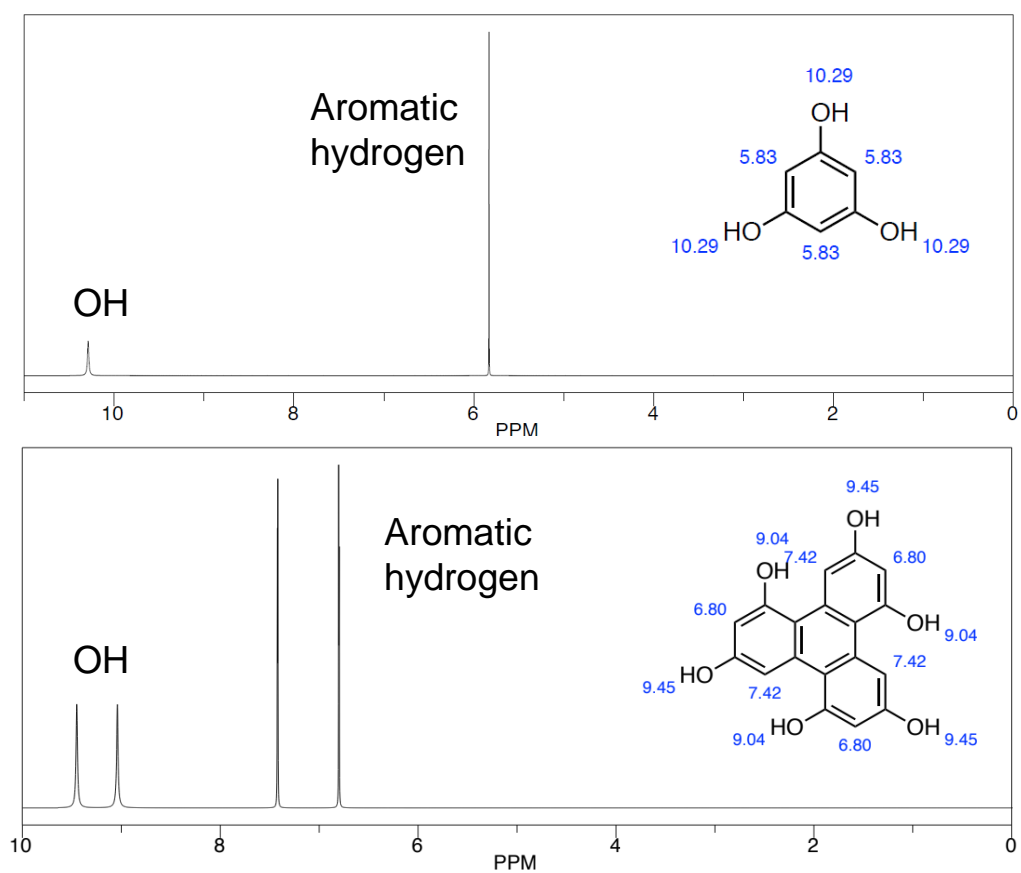

**Fig. S6.** Simulated  $^1\text{H-NMR}$  spectra of PG and the molecule formed by dehydration

condensation of three PG molecules.

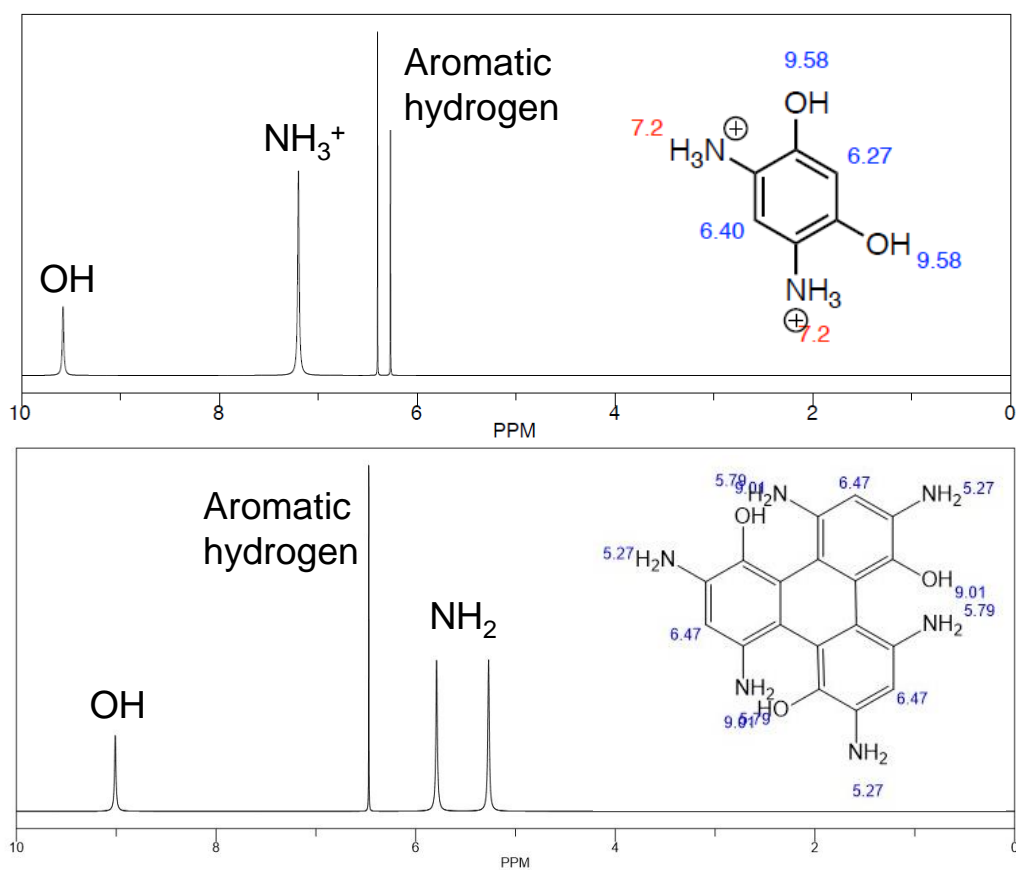

**Fig. S7.** Simulated  $^1\text{H-NMR}$  spectra of DAR and the molecule formed by dehydration

condensation of three DAR molecules.

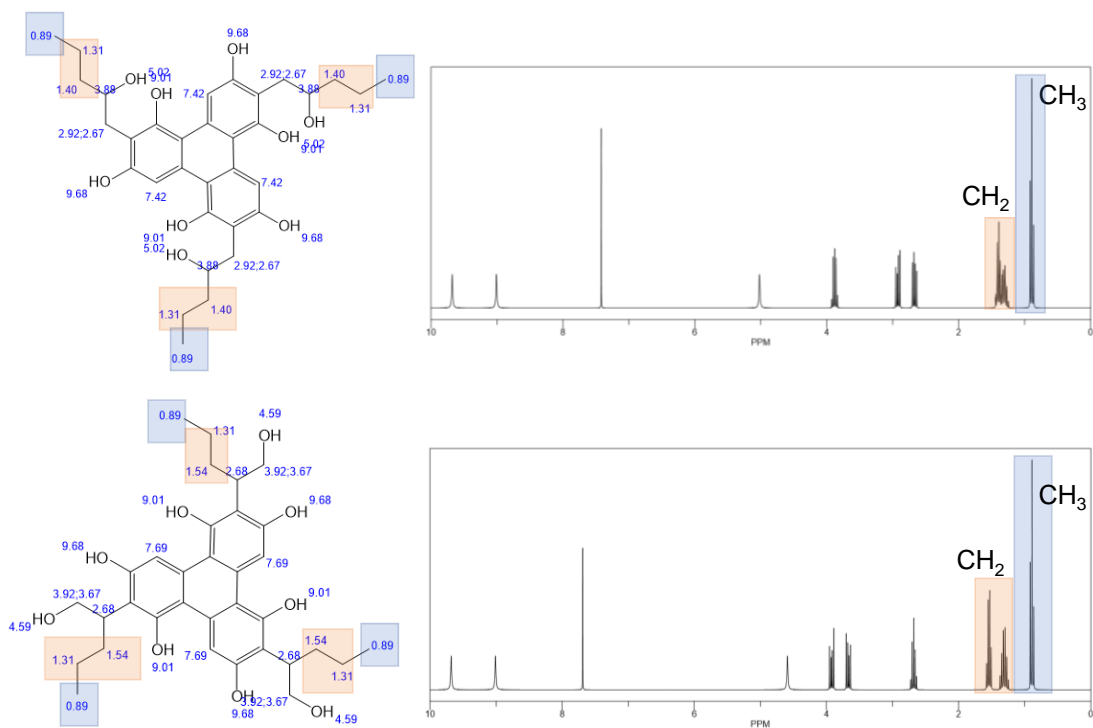

**Fig. S8.** Simulated  $^1\text{H-NMR}$  spectra of the dehydration-condensed structure of three PG molecules bonded to three 1,2-pentanediol molecules.

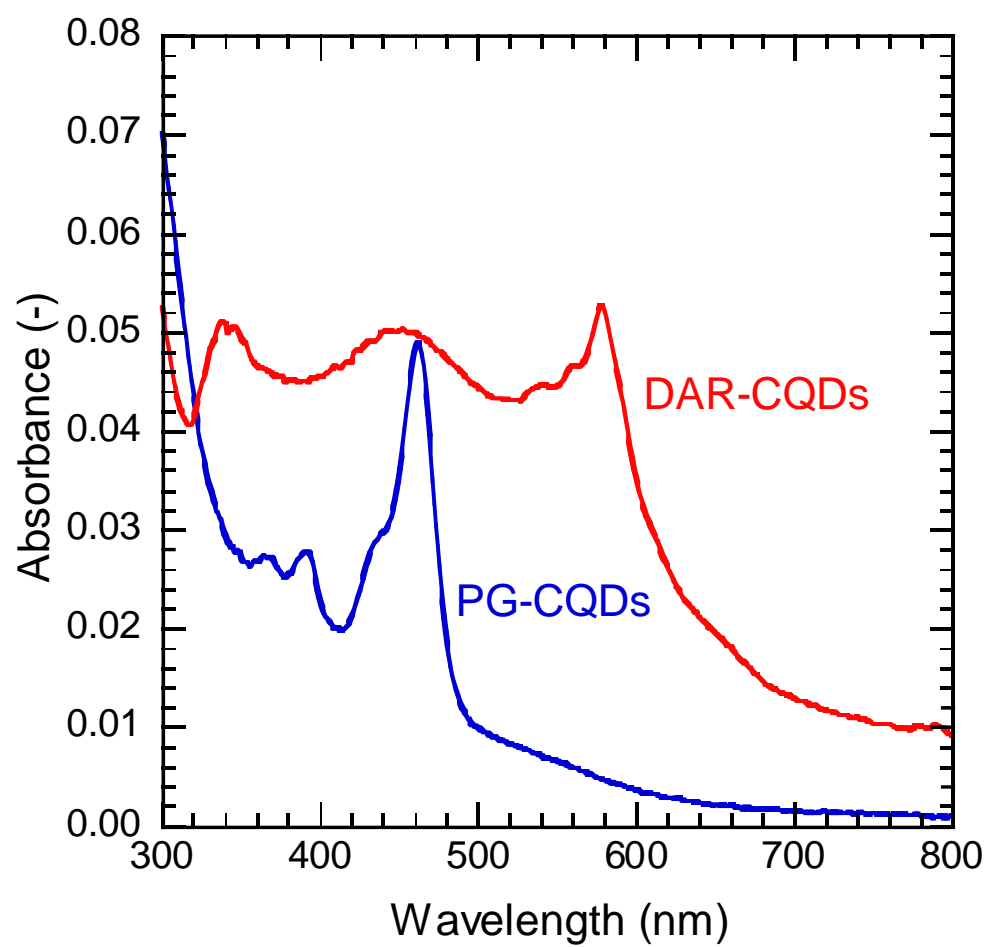

**Fig. S9.** UV-vis spectra of ethanol dispersions of PG-CQDs and DAR-CQDs.

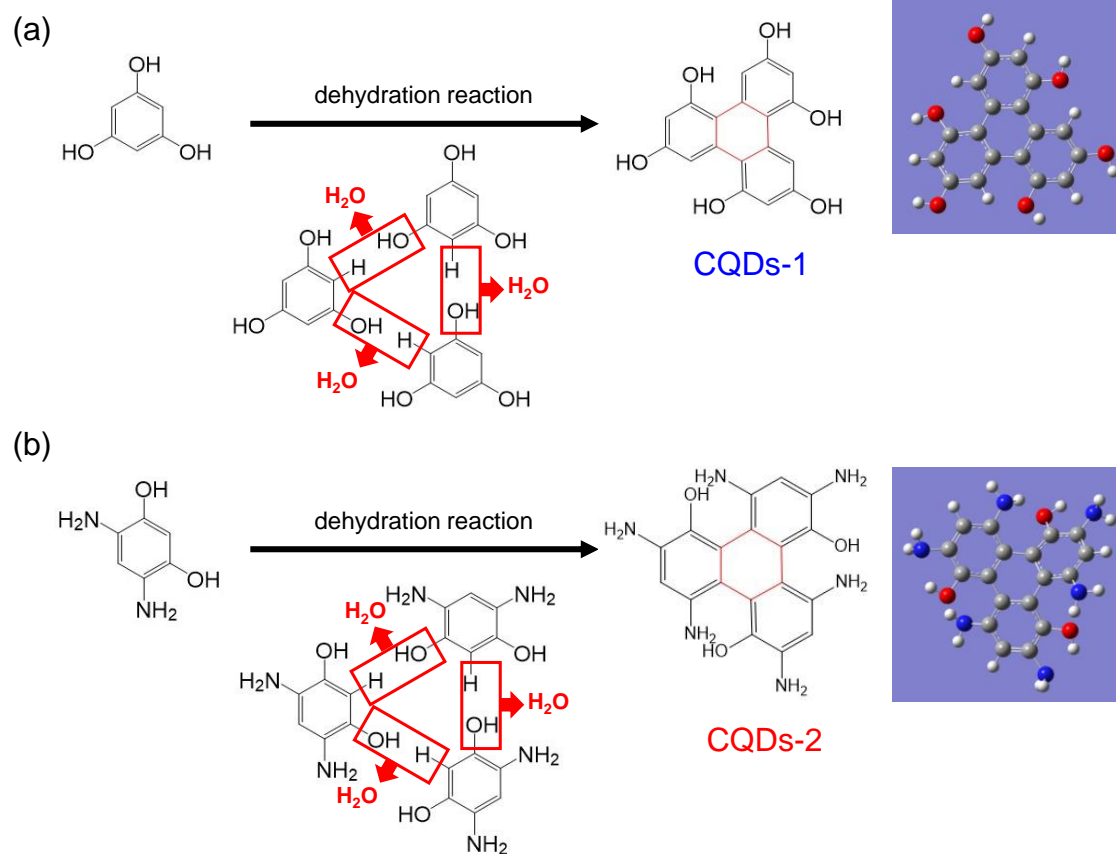

**Fig. S10.** Structural models and optimized structures of CQDs-1 and CQDs-2.

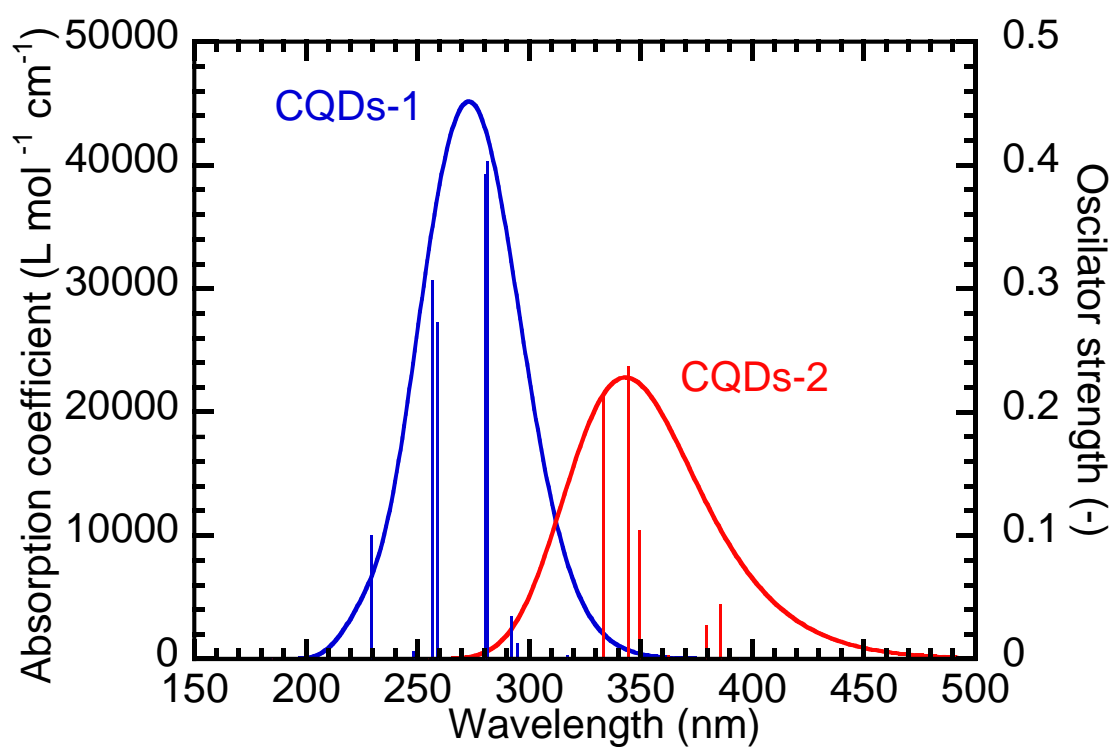

**Fig. S11.** UV-vis absorption spectra with oscillator strength (vertical lines) of CQDs-1 and CQDs-2 obtained by TD-DFT calculations.

**Table S3.** HOMO/LUMO energy levels and HOMO-LUMO energy gaps  $E_{H-L}$  of CQDs-1, CQDs-2, and CQDs-3.

| Sample | HOMO<br>(eV) | LUMO<br>(eV) | $E_{H-L}$<br>(eV) | $E_{H-L}$<br>(nm) |
|--------|--------------|--------------|-------------------|-------------------|
| CQDs-1 | -5.044       | -0.487       | 4.557             | 272               |
| CQDs-2 | -4.349       | -0.543       | 3.806             | 326               |
| CQDs-3 | -4.352       | -0.890       | 3.462             | 358               |

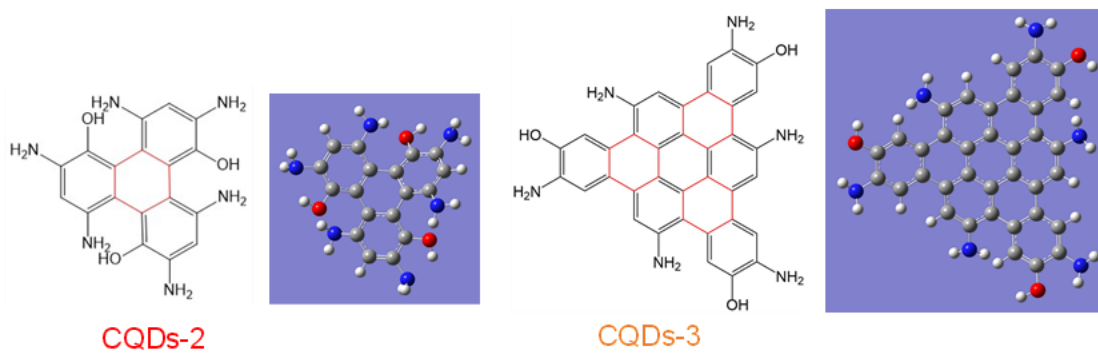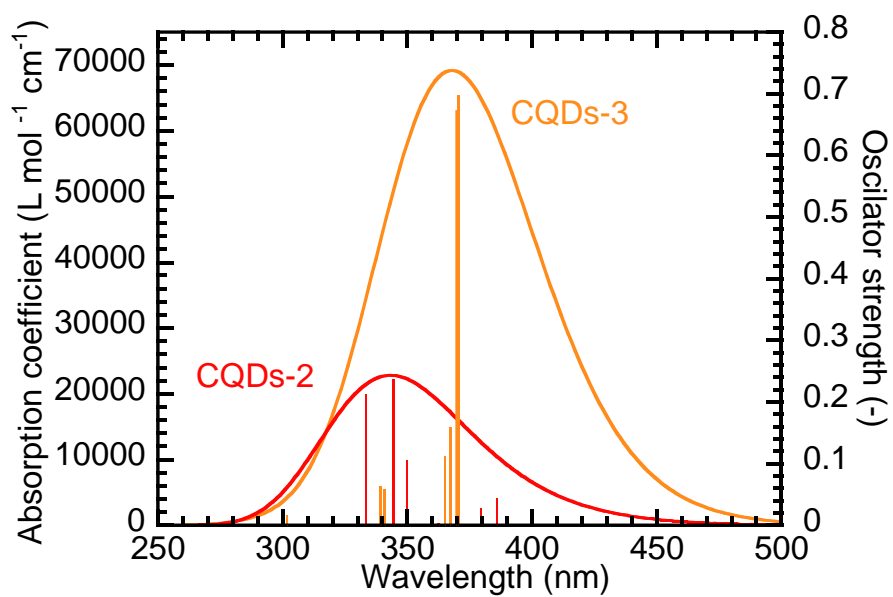

**Fig. S12.** Structural models and optimized structures of CQDs-2 and CQDs-3, and their UV-vis absorption spectra with oscillator strength (vertical lines) obtained by TD-DFT calculations.



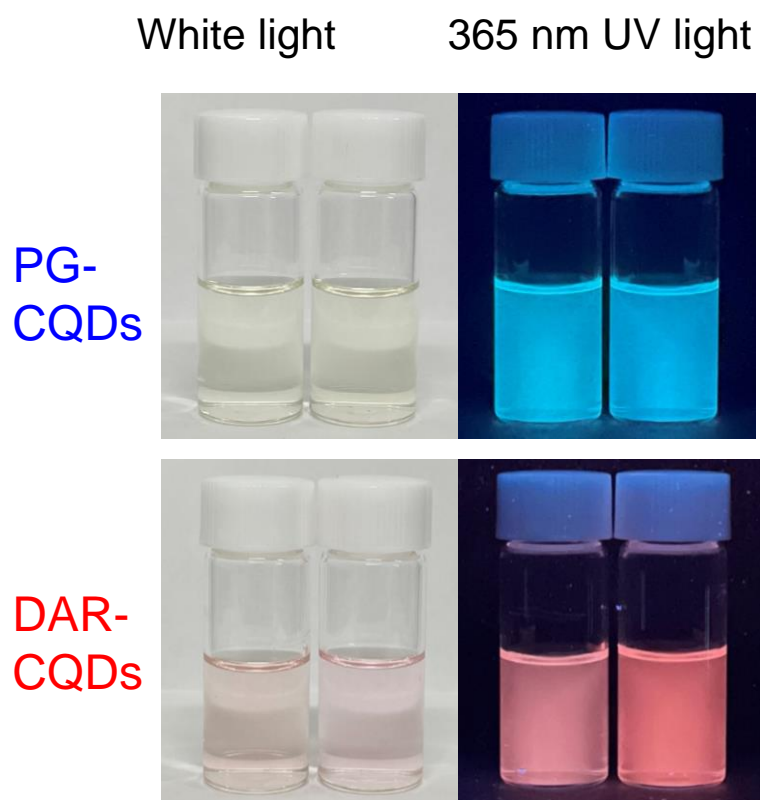

**Fig. S13.** Photographs of PG-CQDs and DAR-CQDs dispersions in methanol (left) and deuterated methanol (right).

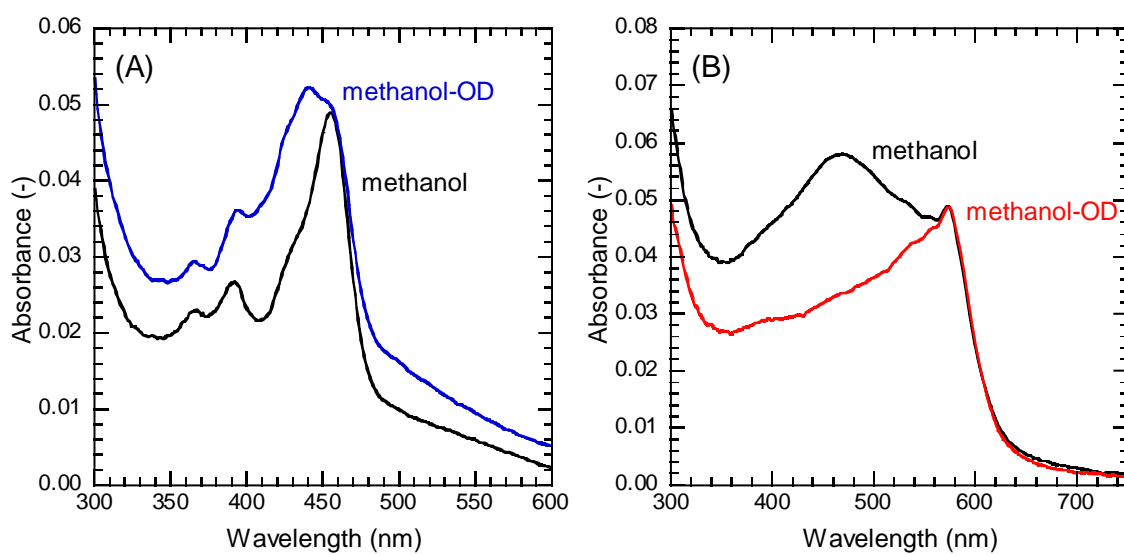

**Fig. S14.** UV-vis spectra of (A) PG-CQDs and (B) DAR-CQDs dispersions in methanol and deuterated methanol.

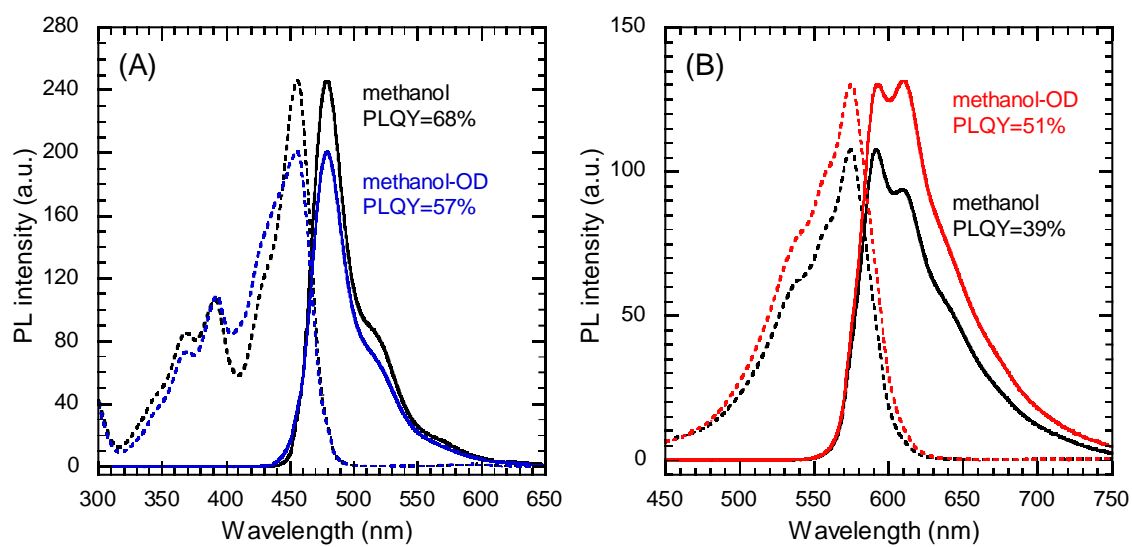

**Fig. S15.** PLE and PL spectra of (A) PG-CQDs and (B) DAR-CQDs dispersions in methanol and deuterated methanol.

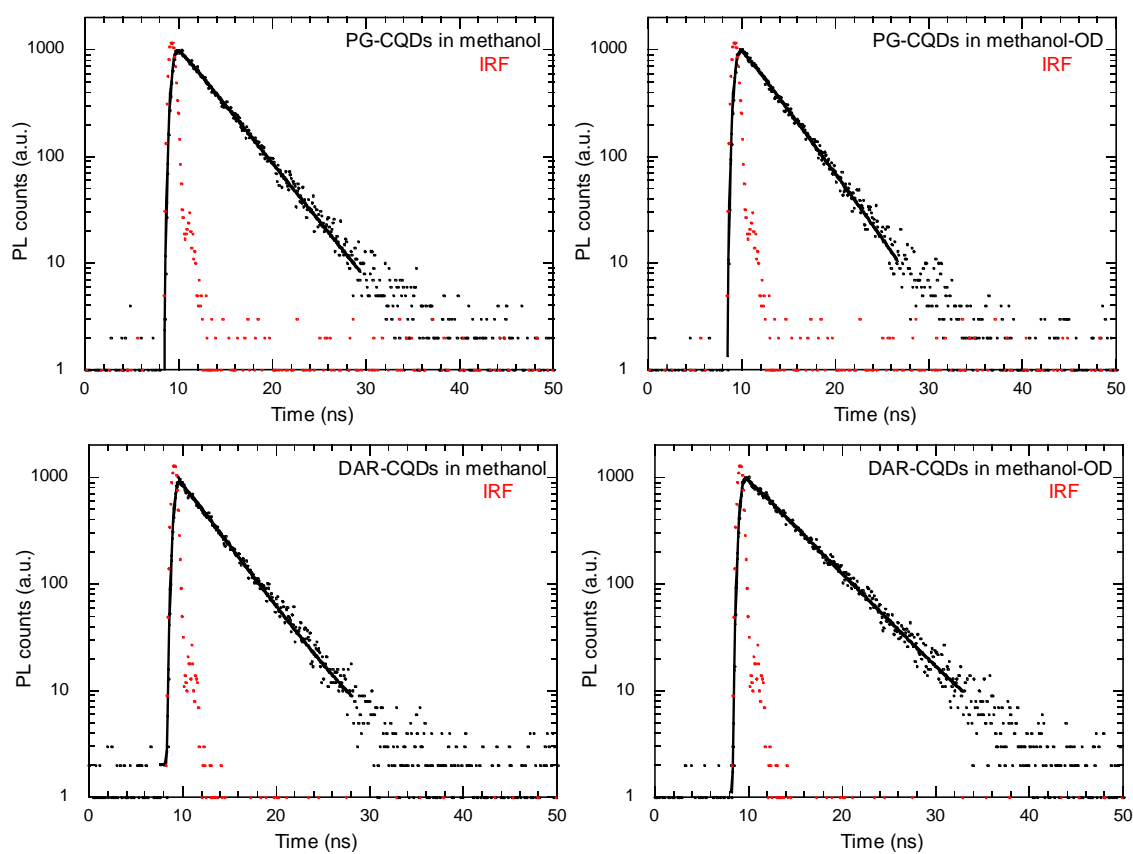

**Fig. S16.** PL decay curves of PG-CQDs and DAR-CQDs dispersions in methanol and deuterated methanol.  $\lambda_{\text{ex}}$ : PG-CQDs 405 nm, DAR-CQDs 590 nm.

**Table S4.** PLQYs of PG-CQD and DAR-CQD ethanol dispersions before and after storage for 26 months in the dark at room temperature.

| Sample   | Storage duration<br>(month) | PLQY |
|----------|-----------------------------|------|
| PG-CQDs  | 0                           | 56   |
|          | 26                          | 53   |
| DAR-CQDs | 0                           | 30   |
|          | 26                          | 32   |

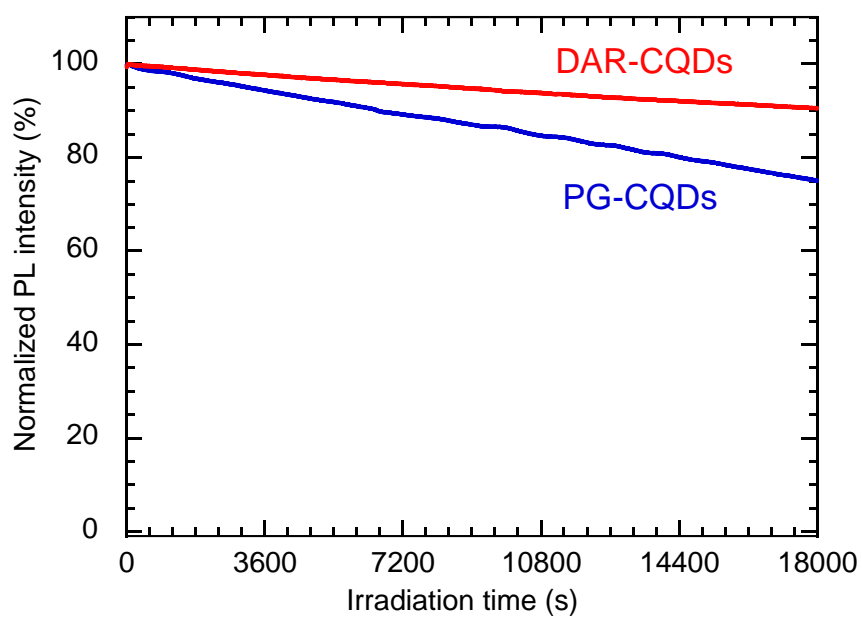

**Fig. S17.** Changes in PL intensities of PG-CQD and DAR-CQD ethanol dispersions with the irradiation time measured under each optimum excitation wavelength.

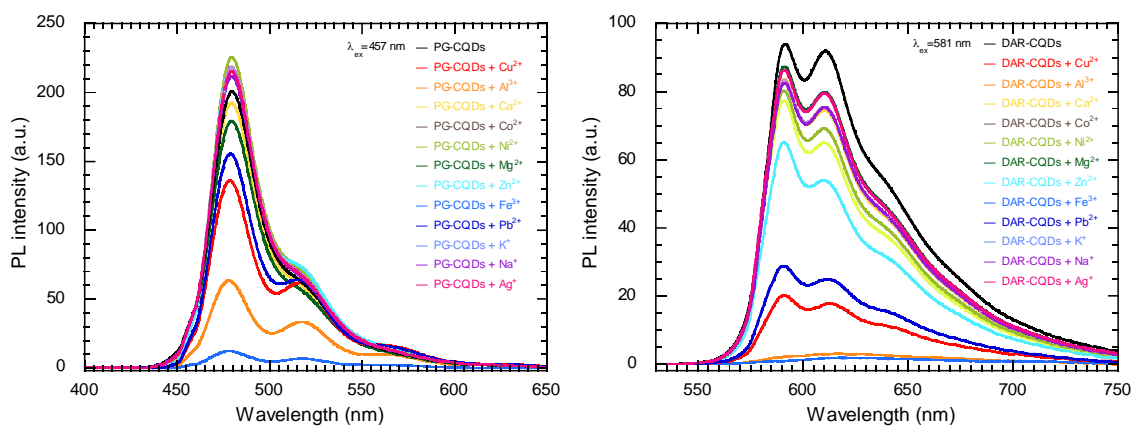

**Fig. S18.** The PL spectra of PG-CQDs and DAR-CQDs aqueous dispersions in the

absence and presence of different metal ions.
